# Supplementary material for: Key developments in magnesiothermic reduction of silica: insights into reactivity and future prospects
Source: Royal Society of Chemistry journal article supplement (doi:10.1039/d4sc04065a), 2024-01-01
Supplement: d4sc04065a1.pdf [file d4sc04065a1.pdf]

## Supplemental Information

# Key Developments in Magnesiothermic Reduction of Silica: Insights into Reactivity and Future Prospects

Maximilian Yan<sup>a,b,‡</sup>, Sarah Martell<sup>a,‡</sup>, Siddharth V. Patwardhan<sup>b</sup>, and Mita Dasog<sup>a\*</sup>

<sup>a</sup>*Department of Chemistry, Dalhousie University, 6243 Alumni Crescent, Halifax, NS B3H4R2, Canada.*

<sup>b</sup>*Department of Chemical and Biological Engineering, The University of Sheffield, Mappin Street, Sheffield S1 3JD, United Kingdom.*

\*Corresponding author: [mita.dasog@dal.ca](mailto:mita.dasog@dal.ca)

‡*These authors contributed equally to the work and their names can be listed in any order.*

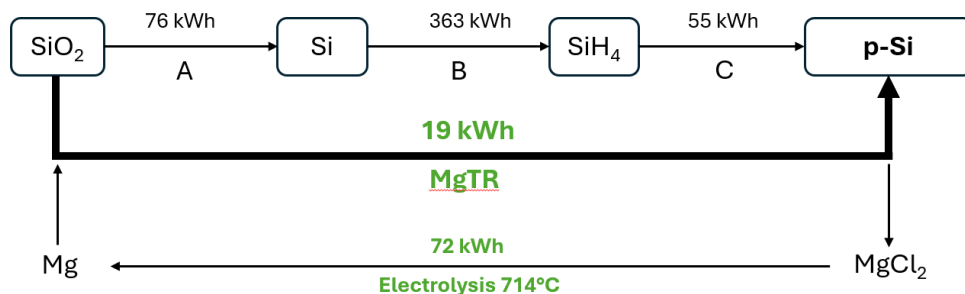

**Figure S1:** Schematic showing high volume production routes to making porous Si, and the energy requirement of each step, normalised to 1 kg of Si.

**Table S1:** Chemical process occurring in each step described in Figure S1, along with associated energy cost and reference source.

| Step         | Process                   | Energy cost (kWh/kg Si) | doi                                                                                                                                                                                                                                    |
|--------------|---------------------------|-------------------------|----------------------------------------------------------------------------------------------------------------------------------------------------------------------------------------------------------------------------------------|
| A            | Carbothermal reduction    | 76                      | <a href="https://doi.org/10.1016/j.jpowsour.2023.233720">https://doi.org/10.1016/j.jpowsour.2023.233720</a><br>*                                                                                                                       |
| B            | Silane production         | 363                     | <a href="https://doi.org/10.1016/j.resconrec.2012.10.002">https://doi.org/10.1016/j.resconrec.2012.10.002</a>                                                                                                                          |
| C            | Siemens process           | 55                      | <a href="https://doi.org/10.1016/j.applthermaleng.2021.117522">https://doi.org/10.1016/j.applthermaleng.2021.117522</a><br><a href="https://doi.org/10.1016/j.jcryspro.2014.05.020">https://doi.org/10.1016/j.jcryspro.2014.05.020</a> |
| MgTR         | Magnesiothermic reduction | 19                      | <a href="https://doi.org/10.1016/j.jpowsour.2023.233720">https://doi.org/10.1016/j.jpowsour.2023.233720</a><br>*                                                                                                                       |
| Electrolysis | Molten salt electrolysis  | 72                      | Calculated here, see Table S3                                                                                                                                                                                                          |

\*Energy cost was calculated with the model used in our previous work<sup>1</sup> under the following conditions:

- Rotary tube furnace with L/D ratio of 5:1
- Ramp rate of 10°C/min
- 1 hour dwell time
- Thermal efficiency of 80%
- Heat capacity of C = 0.71 J/gK
- Mole ratio of C:SiO<sub>2</sub> = 1:1
- Tap density of C:SiO<sub>2</sub> mixture = 1000 kg/m<sup>3</sup>
- Mole ratio of Mg:SiO<sub>2</sub> mixture = 2:1
- Tap density of Mg:SiO<sub>2</sub> mixture = 1000 kg/m<sup>3</sup>

Electrolysis was calculated as follows:

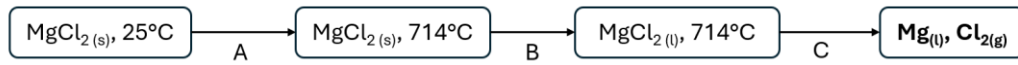

**Figure S2:** Schematic showing the steps of recycling MgCl<sub>2</sub> into Mg.

**Table S2:** Physical process occurring in each step described in Figure S2, and associated energy requirements

| Step | Process            | Energy requirement (kWh/kg Si) |
|------|--------------------|--------------------------------|
| A    | Sensible heating   | 1.02                           |
| B    | Enthalpy of fusion | 0.85                           |
| C    | Electrolysis       | 69.3*                          |

\*This value was calculated assuming an energy efficiency of 20% for the electrolysis process.

**Table S3.** Data for Figure 4A regarding reaction time and temperatures in 50 literature sources.

| Reaction Temp (°C) | Reaction time (h) | Year | Author                    | doi                                                         |
|--------------------|-------------------|------|---------------------------|-------------------------------------------------------------|
| 800                | 6                 | 2024 | Andriayani <i>et al.</i>  | 10.1016/j.mset.2023.09.003                                  |
| 800                | 3                 | 2015 | Andriayani <i>et al.</i>  | 10.14716/ijtech.v6i7.1493                                   |
| 750                | 2                 |      |                           |                                                             |
| 850                | 3                 |      |                           |                                                             |
| 800                | 3                 |      |                           |                                                             |
| 950                | 3                 |      |                           |                                                             |
| 700                | 1.5               | 2021 | Hamedani <i>et al.</i>    | 10.1002/celc.202100683                                      |
| 700                | 0                 |      |                           |                                                             |
| 700                | 3                 |      |                           |                                                             |
| 700                | 6                 |      |                           |                                                             |
| 650                | 3                 | 2017 | Arunmetha <i>et al.</i>   | 10.1007/s11664-017-5794-0                                   |
| 600                | 1                 | 1982 | Banerjee <i>et al.</i>    | 10.1016/0025-5416(82)90046-5                                |
| 750                | 1                 |      |                           |                                                             |
| 850                | 1                 |      |                           |                                                             |
| 650                | 2.5               | 2007 | Bao <i>et al.</i>         | 10.1038/nature05570                                         |
| 650                | 2                 |      |                           |                                                             |
| 650                | 3                 | 2023 | Klinbumrung <i>et al.</i> | 10.1007/s12633-023-02380-z                                  |
| 800                | 0.5               | 2022 | Guo <i>et al.</i>         | 10.1021/acssuschemeng.2c00632                               |
| 680                | 3                 | 2023 | Jaswal <i>et al.</i>      | 10.1016/j.jenvman.2022.116912                               |
| 650                | 6                 | 2023 | Wang <i>et al.</i>        | 10.1016/j.electacta.2023.141950                             |
| 680                | 3                 | 2023 | Su <i>et al.</i>          | 10.1016/j.cej.2022.138394                                   |
| 750                | 2                 | 2024 | Ma <i>et al.</i>          | 10.1016/j.cej.2024.148542                                   |
| 700                | 5                 | 2023 | Ma <i>et al.</i>          | 10.3390/ molecules28073274                                  |
| 660                | 5                 |      |                           |                                                             |
| 650                | 6                 | 2021 | Entwistle <i>et al.</i>   | 10.1039/d0ra09000j                                          |
| 600                | 1                 | 1982 | Banerjee <i>et al.</i>    | 10.1016/0025-5416(82)90046-5                                |
| 750                | 1                 |      |                           |                                                             |
| 850                | 1                 |      |                           |                                                             |
| 700                | 3                 | 2014 | Zhang <i>et al.</i>       | 10.1002/adma.201402813                                      |
| 675                | 0.5               | 2014 | Yoo <i>et al.</i>         | 10.1002/aenm.201400622                                      |
| 900                | 4                 | 2002 | Sandhage <i>et al.</i>    | 10.1002/1521-4095(20020318)14:6<429::AID-ADMA429>3.0.CO;2-C |
| 600                | 5                 | 2017 | Jiang <i>et al.</i>       | 10.1016/j.cej.2017.08.061                                   |
| 650                | 5                 | 2019 | Xing <i>et al.</i>        | 10.1007/s42452-019-0196-y                                   |
| 700                | 6                 | 2016 | Li <i>et al.</i>          | 10.1038/s41598-017-01086-8                                  |
| 700                | 1                 | 2014 | Chen <i>et al.</i>        | 10.1007/s12274-013-0374-y                                   |
| 700                | 2                 |      |                           |                                                             |
| 700                | 3                 |      |                           |                                                             |
| 700                | 4                 |      |                           |                                                             |

|     |     |      |                          |                                 |
|-----|-----|------|--------------------------|---------------------------------|
| 700 | 5   |      |                          |                                 |
| 680 | 3   | 2021 | Wang <i>et al.</i>       | 10.1016/j.jallcom.2020.157955   |
| 700 | 6   | 2016 | Zhou <i>et al.</i>       | 10.1016/j.jpowsour.2016.05.058  |
| 650 | 7   | 2013 | Xing <i>et al.</i>       | 10.1039/c3ra41889h              |
| 750 | 3   | 2016 | Xu <i>et al.</i>         | 10.1039/c6ta01344a              |
| 800 | 12  | 2014 | Xie <i>et al.</i>        | 10.1039/c4nj00752b              |
| 500 | 7   | 2015 | Shuhe <i>et al.</i>      | 10.1007/s11595-016-1476-7       |
| 800 | 2   | 2016 | Gao <i>et al.</i>        | 10.1016/j.electacta.2017.01.119 |
| 700 | 6   | 2014 | Favors <i>et al.</i>     | 10.1038/srep05623               |
| 650 | 7   | 2011 | Jia <i>et al.</i>        | 10.1002/aenm.201100485          |
| 650 | 6   | 2015 | Liu <i>et al.</i>        | 10.1002/ange.201503150          |
| 500 | 1   | 2013 | Xing <i>et al.</i>       | 10.1039/c3cc43134g              |
| 500 | 12  |      |                          |                                 |
| 700 | 6   | 2015 | Wang <i>et al.</i>       | 10.1038/srep08781               |
| 700 | 16  | 2022 | Zuo <i>et al.</i>        | 10.3390/molecules27217486       |
| 800 | 16  |      |                          |                                 |
| 900 | 16  |      |                          |                                 |
| 800 | 5   | 2019 | Falk <i>et al.</i>       | 10.1016/j.ceramint.2019.07.157  |
| 675 | 2   | 2012 | Yoo <i>et al.</i>        | 10.1002/adma.201201601          |
| 700 | 1   | 2026 | Waitzinger <i>et al.</i> | 10.1007/s00706-015-1611-8       |
| 750 | 1   |      |                          |                                 |
| 600 | 1   | 2012 | Batchelor <i>et al.</i>  | 10.1007/s12633-012-9129-8       |
| 600 | 12  | 2015 | Liu <i>et al.</i>        | 10.1016/j.jmmm.2015.06.074      |
| 700 | 12  |      |                          |                                 |
| 800 | 12  |      |                          |                                 |
| 800 | 10  | 2020 | Guo <i>et al.</i>        | 10.1007/s12613-019-1900-z       |
| 800 | 6   |      |                          |                                 |
| 800 | 2   |      |                          |                                 |
| 800 | 14  |      |                          |                                 |
| 700 | 4   | 2023 | Seroka <i>et al.</i>     | 10.3390/coatings13020221        |
| 650 | 6   | 2018 | Khanna <i>et al.</i>     | 10.1139/cjc-2018-0165           |
| 650 | 4   | 2019 | Miao <i>et al.</i>       | 10.1007/s11581-019-03256-2      |
| 650 | 2   | 2016 | Uehira <i>et al.</i>     | 10.1246/cl.160544               |
| 700 | 2   | 2021 | Sekar <i>et al.</i>      | 10.3390/nano11030613            |
| 650 | 3   | 2018 | Tang <i>et al.</i>       | 10.1016/j.clay.2018.07.004      |
| 700 | 6   | 2021 | Hamedani <i>et al.</i>   | 10.1002/celc.202100683          |
| 700 | 3   |      |                          |                                 |
| 700 | 1.5 |      |                          |                                 |
| 700 | 0   |      |                          |                                 |
| 650 | 2.5 | 2011 | Chen <i>et al.</i>       | 10.1149/1.3611433               |
| 600 | 3   |      |                          |                                 |
| 500 | 3.5 |      |                          |                                 |
| 800 | 10  | 2019 | Sun <i>et al.</i>        | 10.1016/j.ijhydene.2019.01.270  |

## References

1. M. Yan, S. Martell, M. Dasog, S. Brown and S. V. Patwardhan, *Journal of Power Sources*, 2023, **588**, 233720.
